# Supplementary material for: Persistent homology classification algorithm
Source: PeerJ Comput Sci. 2023 Jan 10;9:e1195. doi: 10.7717/peerj-cs.1195 (PMC10280283; doi:10.7717/peerj-cs.1195)
Supplement: Supplemental Information 9 [file peerj-cs-09-1195-s009.xlsx]

## Sheet: Sheet1
x1	x2	x3	classname
4.98786	-0.348143	2	1
-4.00305	2.99593	2	1
3.73602	3.32297	2	1
4.52749	2.12175	2	1
0.196318	4.99614	2	1
1.30452	-4.82682	2	1
-2.68079	4.22059	2	1
4.92316	-0.873182	2	1
2.52204	4.31733	2	1
-4.83584	1.2707	2	1
2.3605	4.40773	2	1
0.580601	4.96618	2	1
0.714207	-4.94873	2	1
4.11228	2.84414	2	1
-4.78764	1.44172	2	1
4.30849	2.53711	2	1
-4.64114	-1.86006	2	1
4.99252	0.273327	2	1
4.97994	-0.447483	2	1
-2.03133	4.56877	2	1
-3.20044	-3.84151	2	1
-1.40169	4.79951	2	1
4.99893	-0.103549	2	1
4.15335	-2.78382	2	1
4.98749	-0.353475	2	1
4.58068	2.00434	2	1
-3.48996	-3.58053	2	1
-4.99105	0.299057	2	1
4.91736	-0.905275	2	1
-3.24057	3.80772	2	1
-2.12908	-4.52405	2	1
-0.430491	4.98143	2	1
1.96513	4.59764	2	1
1.98161	4.59056	2	1
-3.62968	3.43881	2	1
2.86279	-4.09932	2	1
-4.99963	0.0604386	2	1
1.26126	-4.83831	2	1
2.63826	-4.2473	2	1
-4.81781	1.33742	2	1
1.52941	-4.76035	2	1
-3.68636	3.37798	2	1
0.304584	-4.99071	2	1
-4.61064	1.93442	2	1
4.12154	-2.83071	2	1
-2.11567	4.53034	2	1
4.34208	2.47918	2	1
2.02284	-4.57254	2	1
4.01676	-2.97752	2	1
4.88962	-1.04479	2	1
-4.48225	-2.21573	2	1
-0.934453	-4.9119	2	1
0.752949	-4.94298	2	1
-3.47368	-3.59633	2	1
-0.844497	-4.92817	2	1
-3.78835	3.26319	2	1
2.6047	4.26797	2	1
1.9213	4.61612	2	1
-3.87747	3.15678	2	1
-0.748059	4.94372	2	1
1.78447	4.67072	2	1
-4.9981	-0.137955	2	1
0.43426	-4.98111	2	1
-1.73298	-4.69007	2	1
-4.80967	-1.3664	2	1
-2.7033	-4.20621	2	1
-4.90379	0.976118	2	1
-4.96736	0.570352	2	1
-2.60079	4.27035	2	1
-4.44826	2.2832	2	1
-1.15241	4.86538	2	1
-4.02297	-2.96913	2	1
2.6988	-4.2091	2	1
-3.62679	-3.44186	2	1
3.31711	3.74123	2	1
-4.55414	-2.06394	2	1
-4.68743	1.74012	2	1
-4.62509	1.89961	2	1
-3.56612	-3.50468	2	1
4.559	-2.05318	2	1
0.978113	0.146502	1.14776	2
-0.996911	0.00353878	1.07846	2
-0.999068	0.0420465	1.00978	2
-0.440444	-0.420286	1.79333	2
-0.595523	-0.486336	1.6394	2
-0.904647	-0.297674	0.695035	2
0.845167	-0.390951	1.36449	2
-0.154134	-0.401439	1.90282	2
0.0838414	-0.980835	1.17588	2
0.737911	0.197882	0.354763	2
0.124071	0.568523	0.186742	2
0.958693	-0.227758	1.17039	2
0.863721	0.234341	1.44617	2
0.239383	0.174645	0.044911	2
0.875447	0.390844	1.28431	2
0.597165	-0.732468	1.32693	2
-0.556614	0.696229	1.45326	2
-0.149617	-0.749721	1.64462	2
-0.0104336	-0.947904	1.31839	2
0.848149	-0.129324	0.486269	2
0.349236	0.215866	1.91183	2
0.281953	0.234863	1.93024	2
0.754028	-0.0458047	1.65524	2
-0.75924	-0.64238	0.895585	2
0.913641	0.221587	1.34082	2
0.108089	-0.941198	0.679901	2
0.460995	0.607459	1.6469	2
0.470588	0.813721	1.34118	2
-0.440318	0.376309	0.184824	2
-0.365829	0.159123	0.0830217	2
-0.402894	-0.197204	0.106251	2
0.485608	0.310081	1.81733	2
0.15553	0.906657	0.607847	2
-0.0624077	0.486374	0.128481	2
-0.425204	-0.89918	0.896668	2
-0.334323	0.918227	1.21234	2
0.547831	-0.681972	0.515443	2
-0.70718	0.706103	0.963751	2
-0.123674	0.854207	0.49499	2
0.40441	0.390714	1.82692	2
0.430932	-0.549816	1.71554	2
-0.363681	0.816424	1.44854	2
-0.382776	0.923237	0.966595	2
-0.902381	-0.122196	1.41325	2
-0.265777	0.495648	1.82686	2
-0.203417	0.776759	0.403958	2
0.862495	0.323521	0.610851	2
0.835577	0.0471047	1.54735	2
0.0495169	-0.722887	0.310811	2
0.503127	0.550726	1.66601	2
-0.404782	-0.914101	1.02389	2
-0.00422912	0.448061	0.106007	2
0.318615	0.751659	0.422511	2
0.928506	0.200319	0.687351	2
0.4467	0.700422	0.443342	2
0.276372	-0.434981	1.85698	2
-0.958573	0.272202	0.916069	2
0.326185	0.938769	1.11098	2
0.153329	0.24918	0.0437575	2
-0.632739	0.708418	0.687293	2
0.0517246	-0.989795	0.86722	2
0.102694	-0.564452	0.180947	2
0.4898	0.148856	1.85903	2
0.806885	0.237217	1.54099	2
0.396657	0.599845	0.305127	2
0.665488	-0.042991	1.74517	2
0.654268	-0.756152	0.987021	2
0.77881	0.328103	0.465395	2
0.922753	0.249225	0.706037	2
0.30451	-0.477188	0.175642	2
0.385657	-0.317077	1.86645	2
-0.605795	0.720504	0.662529	2
-0.561657	-0.827263	1.01329	2
-0.933337	-0.223417	0.718989	2
-0.701235	0.290355	1.65113	2
-0.620532	-0.373388	0.310419	2
-0.487654	-0.87299	0.990918	2
-0.427066	0.904025	1.0188	2
-0.0509756	0.998699	0.998973	2
0.984326	-0.00443234	0.823696	2
3.93696	0.693489	-1.06963	3
-1.67966	3.34967	-0.335406	3
3.49798	0.212194	-0.136534	3
-3.21579	1.30927	-0.118455	3
-1.24085	-2.88752	-1.98975	3
0.784652	1.88574	-0.711657	3
1.51654	-1.4115	-1.37201	3
-3.93594	0.690132	-1.0895	3
1.92611	1.36355	-1.7683	3
-3.14858	2.46301	-1.0707	3
-0.474971	-3.95505	-1.18105	3
-0.988016	-2.37702	-1.90481	3
-2.73191	-2.01228	-0.0804723	3
-2.20498	2.75362	-1.84946	3
0.345089	-3.28782	-1.95207	3
2.89791	0.985559	-1.99814	3
3.19331	-2.10431	-1.56614	3
-1.55873	2.36336	-1.98563	3
-3.28578	-1.26516	-0.146407	3
-2.04489	0.875709	-0.368645	3
-0.519718	3.31642	-0.0658554	3
2.71253	2.46228	-0.251755	3
2.23009	-0.199086	-0.351299	3
2.19035	-1.08204	-0.169461	3
3.84202	-0.241226	-1.52745	3
-3.23557	-1.19415	-1.89358	3
1.64749	-1.71543	-1.78336	3
0.0607672	-3.96174	-1.27232	3
-2.75289	1.41778	-1.99533	3
-2.29061	1.23311	-1.91714	3
-0.854468	-1.89406	-1.3869	3
1.96661	1.89506	-1.96316	3
-0.811376	2.95034	-1.99821	3
0.729333	2.17439	-1.70766	3
1.94123	-2.52103	-1.98333	3
3.27436	1.04314	-0.1003	3
-1.70423	-2.92542	-0.0773474	3
-2.57787	1.93688	-0.0255084	3
3.88066	0.851644	-0.769254	3
2.04556	3.37816	-1.31464	3
0.0752106	2.16613	-1.55393	3
-2.98407	1.44874	-1.94837	3
3.87053	0.655244	-0.6215	3
-0.965958	-2.65193	-1.9841	3
2.82441	-2.43391	-0.31488	3
2.54188	-3.01329	-0.664987	3
-2.72297	2.24911	-1.84692	3
-1.98825	2.96739	-1.82032	3
1.33685	1.54719	-1.29578	3
-1.81443	2.31418	-1.99824	3
-2.77865	0.726392	-1.99178	3
2.59323	-2.75261	-0.376417	3
-2.34357	-2.8135	-1.74976	3
-3.48544	0.496103	-1.85382	3
1.474	3.64285	-0.631837	3
-3.02212	-0.184398	-1.99962	3
-3.07575	0.439463	-1.99426	3
1.73925	3.51707	-1.3833	3
-0.681886	3.50115	-1.82376	3
2.13313	1.86645	-0.013806	3
-0.199721	-3.25303	-1.96584	3
-3.34861	0.0711188	-1.93699	3
3.65893	-0.49775	-1.72129	3
-1.47115	-2.0569	-1.88205	3
1.21998	-3.33645	-1.83351	3
2.85484	-1.77789	-0.0682815	3
-2.07973	0.130012	-1.40071	3
2.03833	0.618341	-1.49314	3
-0.391883	-2.5745	-1.91832	3
2.75689	1.96493	-0.0772769	3
1.77783	-1.50687	-1.74283	3
-2.86196	2.27502	-0.245259	3
2.6695	2.4971	-1.7553	3
1.60136	-3.01372	-0.0891538	3
-0.282263	2.11157	-0.506325	3
3.59259	-1.13468	-1.64103	3
-1.1844	-1.64578	-1.23357	3
2.30521	2.75806	-1.80405	3
2.6392	1.47009	-1.99978	3
-2.1894	0.690147	-1.7098	3
